# Supplementary material for: Vapor-induced marangoni coating for organic functional films
Source: Royal Society of Chemistry journal article supplement (doi:10.1039/d1tc04649g), 2021-01-01
Supplement: d1tc04649g1.pdf [file d1tc04649g1.pdf]

## Supporting Information

### **Vapor-Induced Marangoni Coating for Organic Functional Film**

Zhaoxin Liu, Zheng Li, Zheren Cai, Yali Qiao\*, Yongrui Yang, Shengnan Chen, Xiaoying Ma, Huizeng Li, Qing Meng, Fengjiao Zhang, Yanlin Song\*

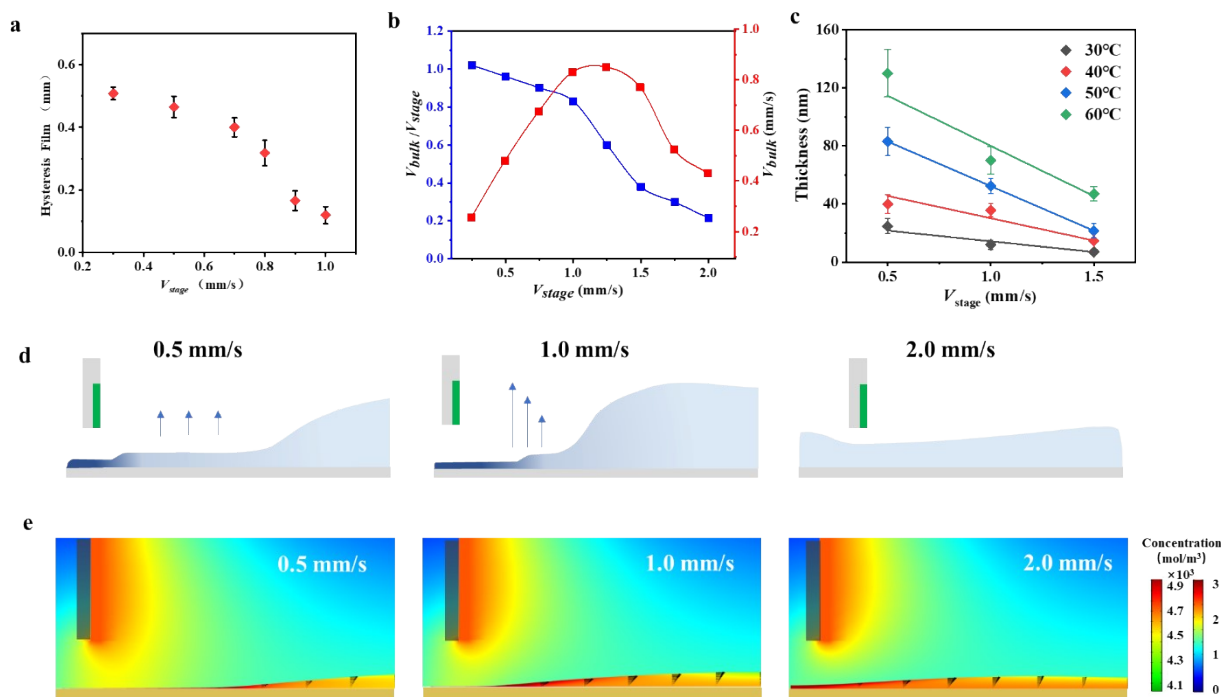

Figure S1. (a) Variation of the length of hysteresis film ( $l$ ) with  $V_{stage}$ . (b) Variation of the ratio of  $V_{bulk}$  to  $V_{stage}$  and  $V_{bulk}$  with  $V_{stage}$ . (c) The film thickness related to stage temperature and velocity. (d) Schematic illustration of the meniscus shape comparing with the  $V_{stage}$ . (e) The diagram is the simulation of the liquid film deformation and solution flow rate with different  $V_{stage}$ .

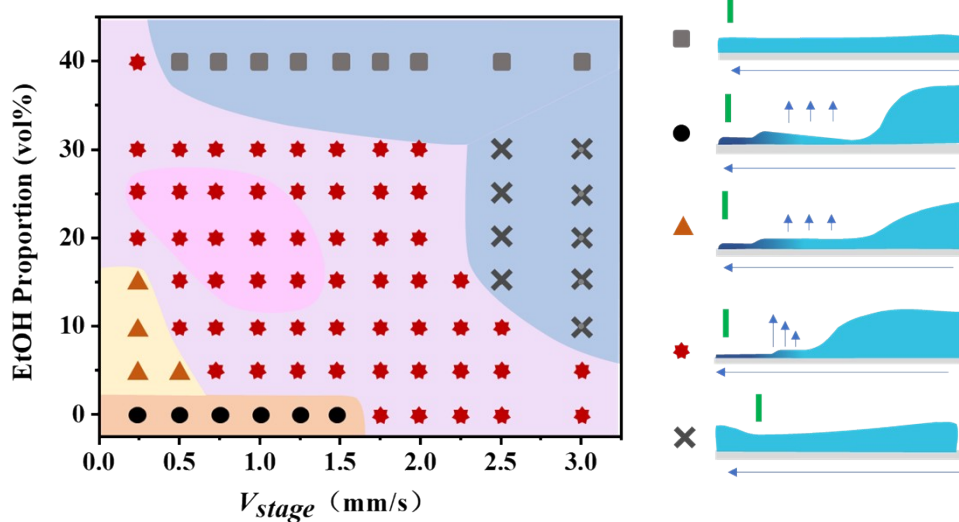

Figure S2. Phase image of vapor-induced coating related to surface tension difference and stage velocity  $V_{stage}$ .

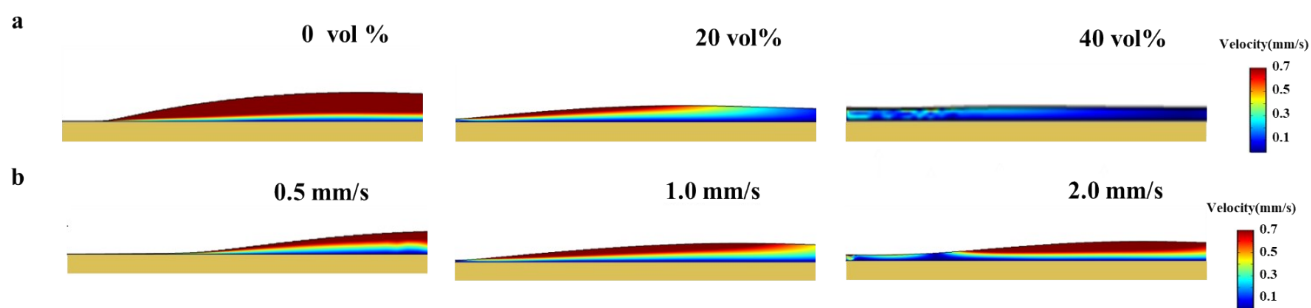

Figure S3. Simulation diagram of liquid film deformation and solution flow rate. (a) The diagram is the simulation of the liquid film deformation and solution flow rate with different concentrations of ethanol. (b) The diagram is the simulation of the liquid film deformation and solution flow rate with different  $V_{stage}$ .

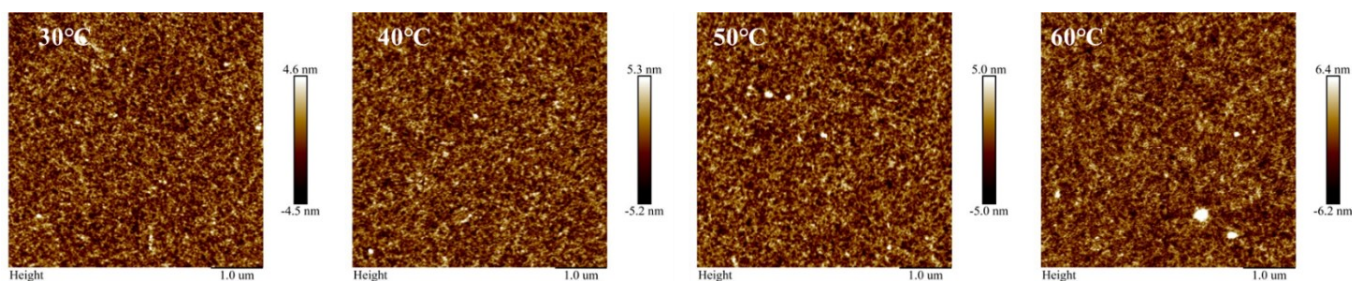

Figure S4. AFM morphology images of vapor-induced PEDOT:PSS films at different temperatures. The morphology of PEDOT:PSS films is similar at different temperatures.

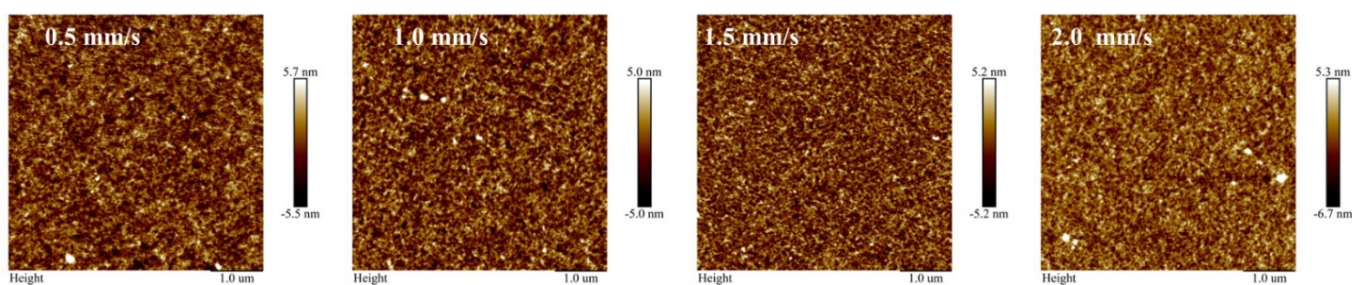

Figure S5. AFM morphology images of vapor-induced PEDOT:PSS films at different  $V_{stage}$ . The morphology of PEDOT:PSS films is similar at different velocities.

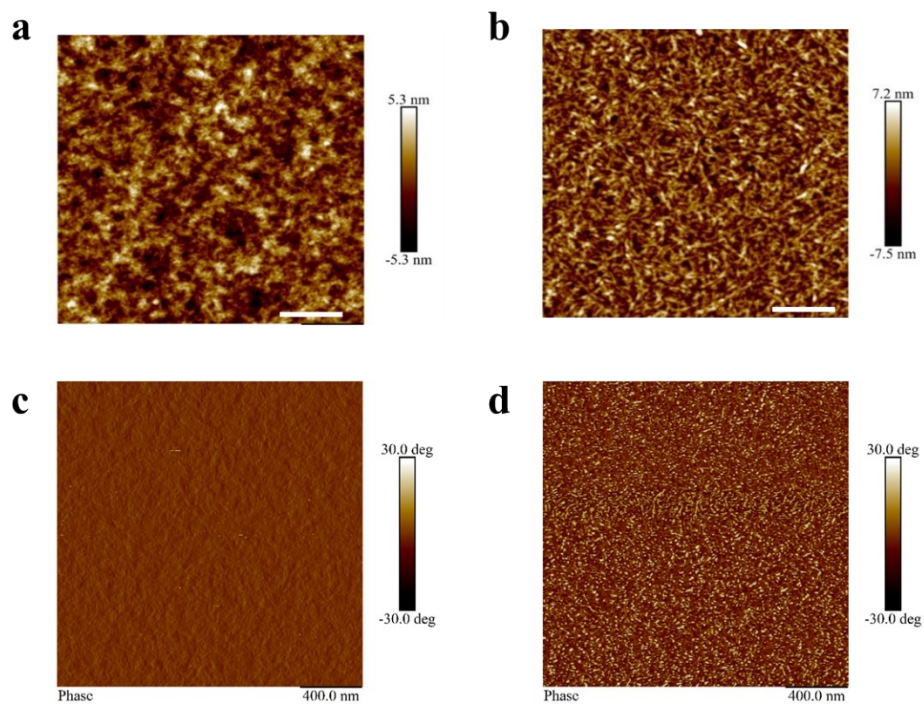

Figure S6. (a-b) AFM morphology images of blade coating PEDOT:PSS films before (a) and after  $\text{H}_2\text{SO}_4$  treated (b), scale bars, 400 nm. (c-d) AFM phase images of blade coating PEDOT:PSS films before (c) and after  $\text{H}_2\text{SO}_4$  treated (d), scale bars, 400 nm. Blade-coating film shows small particles without obvious phase separation.

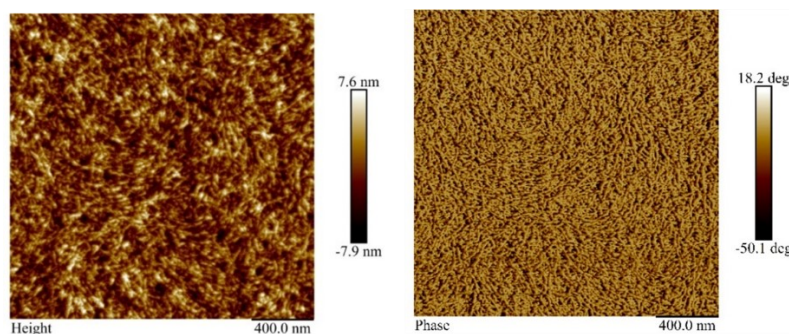

Figure S7. (a) AFM morphology images of vapor-induced coating PEDOT:PSS films after  $\text{H}_2\text{SO}_4$  treated, (b) AFM phase images of vapor-induced coating PEDOT:PSS films after  $\text{H}_2\text{SO}_4$  treated, scale bars, 400 nm.

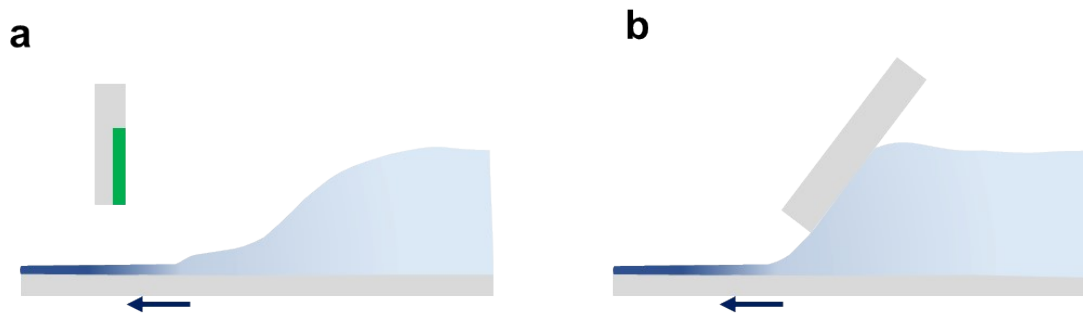

Figure S8 Schematic of (a) vapor-induced coating and (b) blade coating.

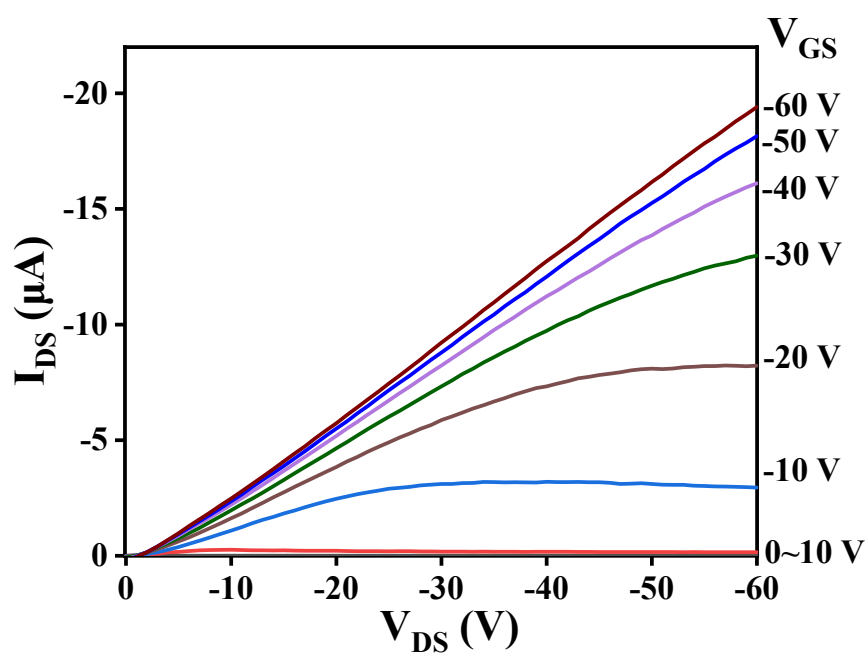

Figure S9. Output curves for organic field-effect transistors (OFETs).
